# Supplementary material for: A QbD Approach for Evaluating the Effect of Selective Laser Sintering Parameters on Printability and Properties of Solid Oral Forms
Source: MDPI journal article supplement (doi:10.3390/pharmaceutics13101701), 2021-10-15
Supplement: s1 [file s1]

# Supplementary Materials: A QbD Approach for Evaluating the Effect of Selective Laser Sintering Parameters on Printability and Properties of Solid Oral Forms

Yanis A Gueche, Noelia M Sanchez-Ballester, Bernard Bataille, Adrien Aubert, Jean-Christophe Rossi and Ian Soulairol

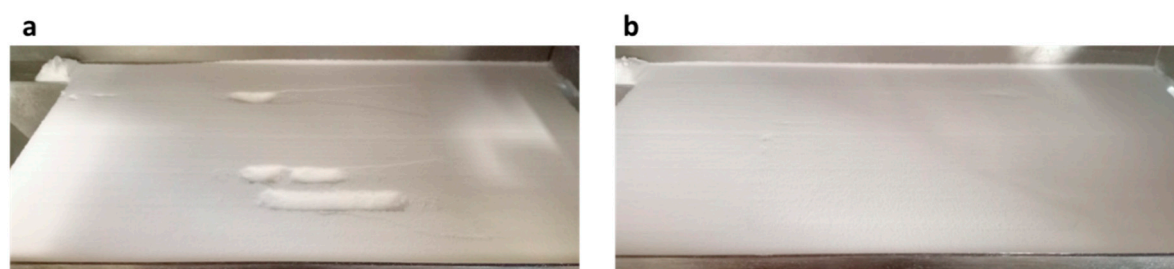

**Figure S1.** Aspect of the powder bed after SLS printing: (a) presence of curling, (b) absence of curling.

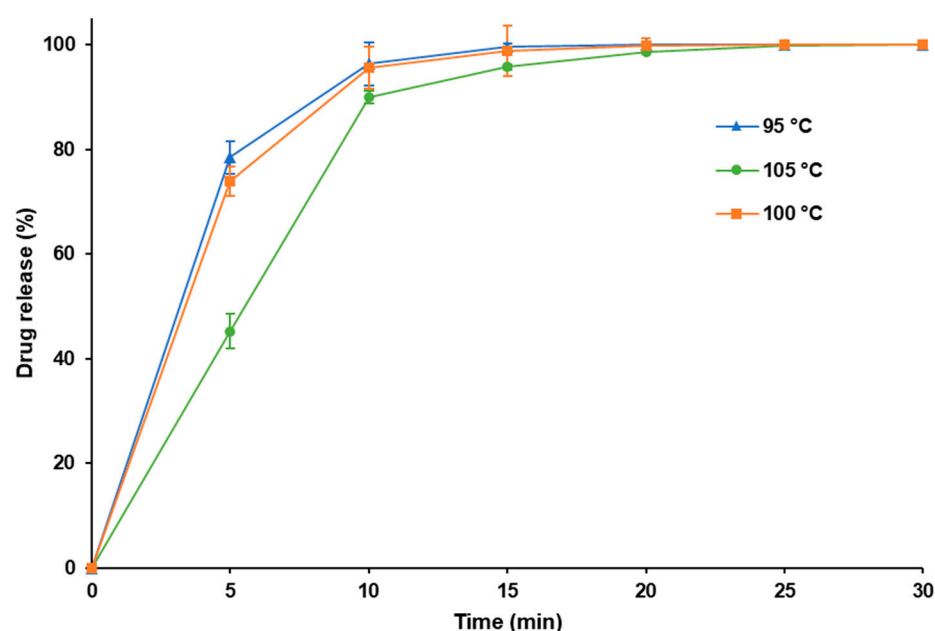

**Figure S2.** Dissolution profiles of SOFs printed at different temperatures (95, 100, 105 °C).

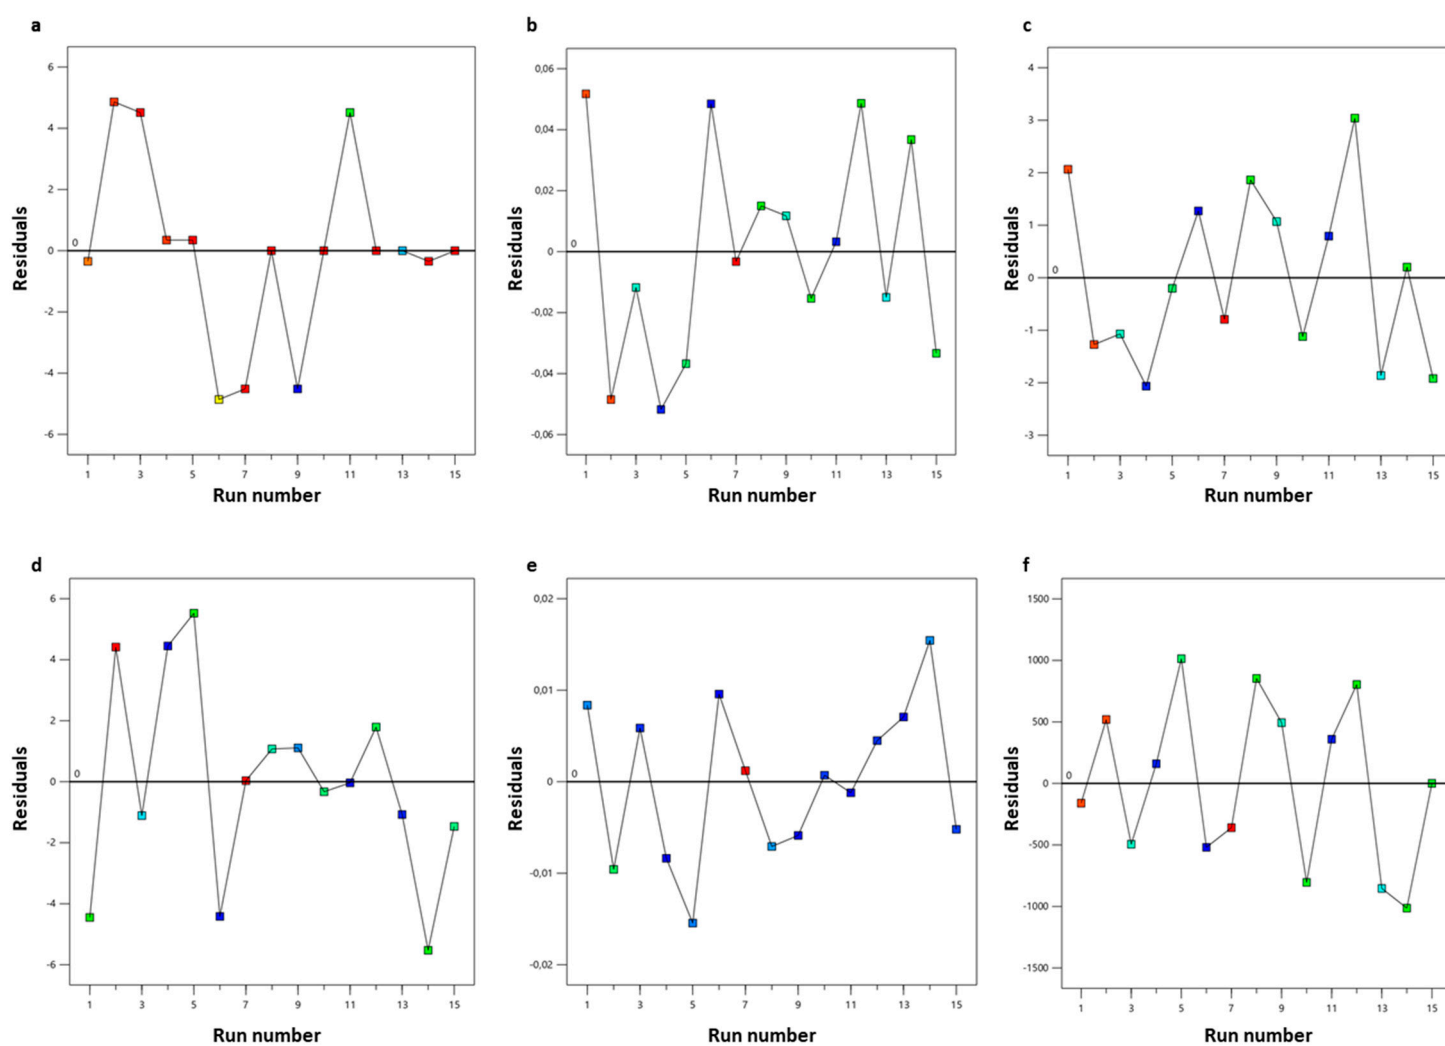

**Figure S3.** Residuals vs. run plots: (a) yield, (b) height, (c) weight, (d) hardness, (e) disintegration time (response transform), (f) percentage of drug release at 10 min (response transform).

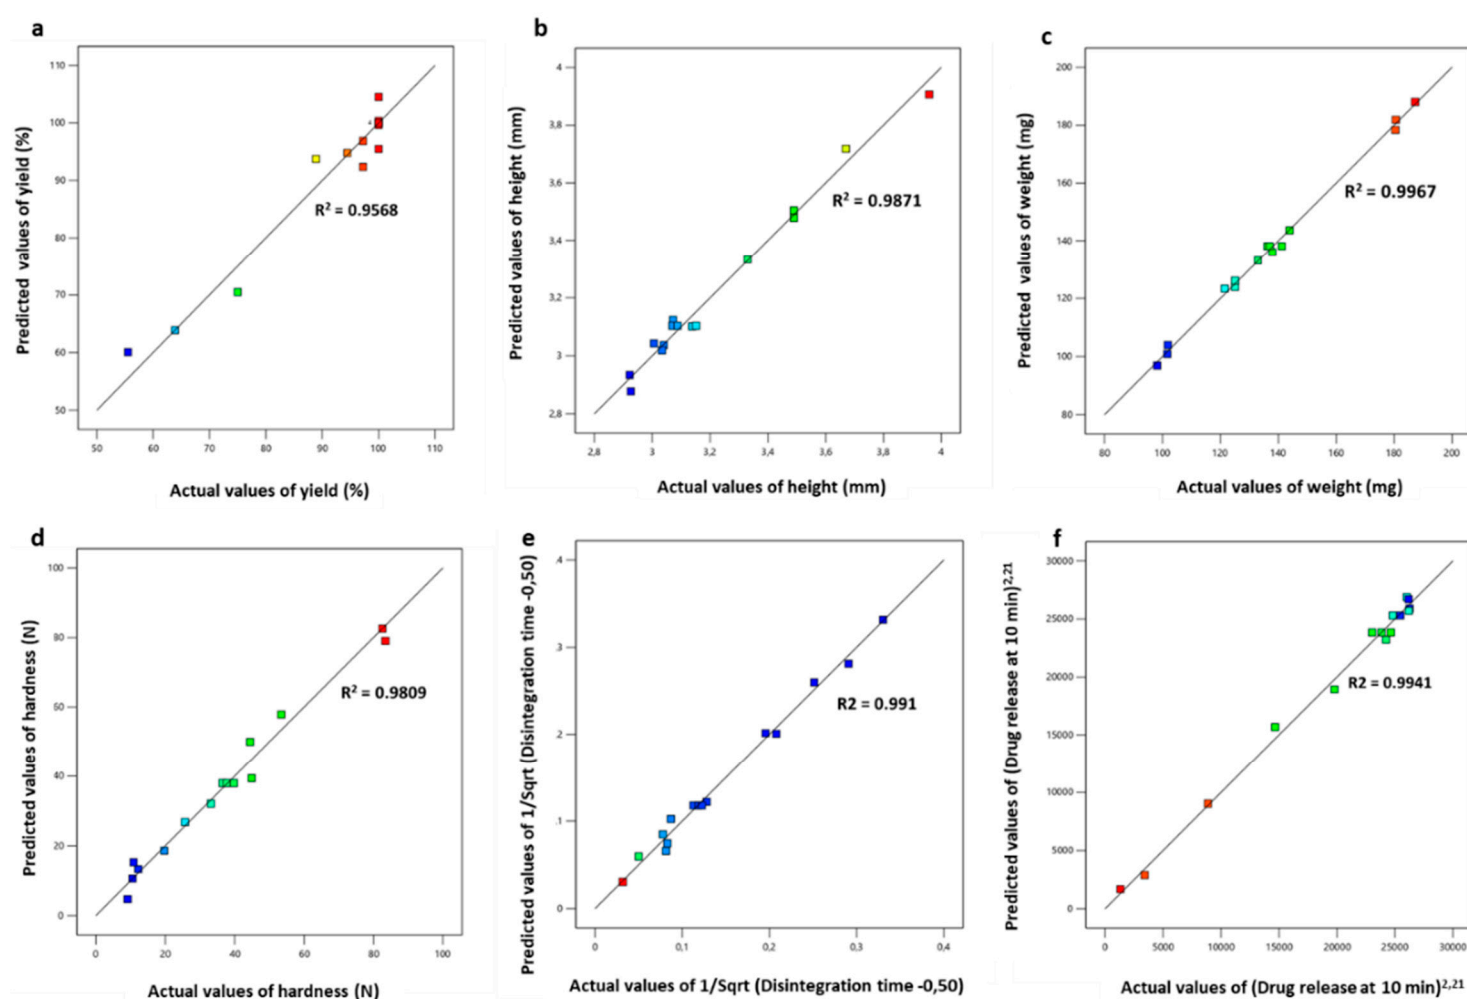

**Figure S4.** Plots of predicted *vs.* actual responses: (a) yield, (b) height, (c) weight, (d) hardness, (e) disintegration time (response transform), (f) percentage of drug release at 10 min (response transform).

**Table S1.** Average thickness of the sintered layer for each printing run.

| Run | Height of SOF (mm) | LT ( $\mu\text{m}$ ) | ASLT ( $\mu\text{m}$ ) |
|-----|--------------------|----------------------|------------------------|
| 1   | 3.96               | 80                   | 131.9                  |
| 2   | 3.67               | 80                   | 122.3                  |
| 3   | 2.92               | 120                  | 146.1                  |
| 4   | 3.07               | 120                  | 153.6                  |
| 5   | 3.01               | 100                  | 125.3                  |
| 6   | 2.93               | 120                  | 146.3                  |
| 7   | 3.33               | 100                  | 138.8                  |
| 8   | 3.03               | 120                  | 151.7                  |
| 9   | 3.49               | 80                   | 116.3                  |
| 10  | 3.09               | 100                  | 128.7                  |
| 11  | 3.04               | 100                  | 126.7                  |
| 12  | 3.15               | 100                  | 131.3                  |
| 13  | 3.49               | 80                   | 116.3                  |
| 14  | 3.14               | 100                  | 130.8                  |
| 15  | 3.07               | 100                  | 127.9                  |

**Table S2.** Kinetic parameters (**a** and **b**) of Weibull model fitted to the dissolution profiles of SOFs printed at each run and the corresponding root mean square error (RMSE).

| Run | a      | b      | RMSE   |
|-----|--------|--------|--------|
| 1   | 6.1080 | 1.1321 | 0.6832 |
| 2   | 1.0068 | 1.1126 | 1.7795 |
| 3   | 2.8423 | 1.1556 | 0.0405 |
| 4   | 2.6304 | 1.1557 | 0.0546 |
| 5   | 2.8369 | 1.1557 | 0.0103 |
| 6   | 2.2815 | 1.1585 | 0.0045 |
| 7   | 1.9790 | 1.0805 | 1.4024 |
| 8   | 3.5157 | 1.1509 | 0.2963 |
| 9   | 2.2422 | 1.1586 | 0.0083 |
| 10  | 3.1812 | 1.1517 | 0.0252 |
| 11  | 2.2709 | 1.1587 | 0.0002 |
| 12  | 2.8103 | 1.2477 | 0.0948 |
| 13  | 2.5282 | 1.1565 | 0.0062 |
| 14  | 4.6830 | 1.1421 | 0.9509 |
| 15  | 3.1848 | 1.1515 | 0.1636 |

**Table S3.** Drug content of the SOFs printed at each run.

| Run | Weight-normalized Drug Content (%) |
|-----|------------------------------------|
| 1   | 102.6 $\pm$ 5.4                    |
| 2   | 100.8 $\pm$ 1.4                    |
| 3   | 99.9 $\pm$ 1.3                     |
| 4   | 99.8 $\pm$ 2.3                     |
| 5   | 102.6 $\pm$ 2.8                    |
| 6   | 98.5 $\pm$ 1.0                     |
| 7   | 101.7 $\pm$ 1.8                    |
| 8   | 100.6 $\pm$ 2.1                    |
| 9   | 99.9 $\pm$ 7.6                     |
| 10  | 99.7 $\pm$ 1.8                     |
| 11  | 99.5 $\pm$ 4.3                     |
| 12  | 100.5 $\pm$ 4.3                    |
| 13  | 99.7 $\pm$ 0.3                     |
| 14  | 101.6 $\pm$ 2.2                    |
| 15  | 99.9 $\pm$ 1.8                     |
